# Supplementary material for: Machine Learning-Enabled 30-Day Readmission Model for Stroke Patients
Source: PubMed Central journal article supplement (PMC8044392; doi:10.3389/fneur.2021.638267), 2021-03-31
Supplement: Data_Sheet_1.pdf [file Data_Sheet_1.pdf]

## Supplemental Materials

*Table I. Characteristics of stroke readmission studies.*

| Author(s)                     | Year | Stroke type             | Number of patients | Number of variables | Study location | Method of analysis                     | Follow-up period |
|-------------------------------|------|-------------------------|--------------------|---------------------|----------------|----------------------------------------|------------------|
| Lichtman, Leifheit-Limson (2) | 2013 | Ischemic                | 44,379             | 17                  | U.S.           | Logistic regression                    | 30-day           |
| Chuang, Wu (3)                | 2005 | Ischemic or hemorrhagic | 489                | 18                  | Taiwan         | Logistic regression                    | 30-day           |
| Jia, Zheng (4)                | 2007 | Ischemic or hemorrhagic | 1818               | 19                  | U.S.           | Logistic regression                    | 1 year           |
| Wen, Liu (5)                  | 2018 | Ischemic or hemorrhagic | 50,912             | 18                  | China          | Logistic regression                    | 31-day           |
| Smith, Liou (6)               | 2006 | Ischemic                | NA                 | 26                  | U.S.           | Cox regression                         | 30-day           |
| Kennedy (8)                   | 2005 | Ischemic or hemorrhagic | 38,468             | 21                  | U.S.           | Truncated negative binomial regression | 1 year           |
| Smith, Frytak (9)             | 2005 | Ischemic                | 9003               | 13                  | U.S.           | Cox regression                         | 30-day           |
| Heller, Fisher (10)           | 2000 | Ischemic or hemorrhagic | 1075               | 7                   | Australia      | Logistic regression                    | 1 year           |
| Lee, Yau (31)                 | 2004 | Ischemic                | 678                | 11                  | Australia      | Negative binomial regression           | NA               |

*Table II. Correlations above 30% and 50% between independent variables.*

| Variables                                                                                             | Correlations 50%<br>or more | Correlations 30%<br>or more |
|-------------------------------------------------------------------------------------------------------|-----------------------------|-----------------------------|
| Age & Medicare                                                                                        | 0.64                        | 0.64                        |
| CKD & Hypertension                                                                                    | -0.55                       | -0.55                       |
| CKD & Kidney Disease                                                                                  | 0.88                        | 0.88                        |
| Hypertension & Kidney Disease                                                                         | -0.51                       | -0.51                       |
| Respiratory Failure & Insert Endotracheal Tube                                                        | 0.54                        | 0.54                        |
| Female & Male                                                                                         | -0.99                       | -0.99                       |
| Married & Previously Married                                                                          | -0.74                       | -0.74                       |
| Medicare & Private                                                                                    | -0.64                       | -0.64                       |
| GMC & MWV                                                                                             | -1.00                       | -1.00                       |
| Age & Atrial Fibrillation                                                                             |                             | 0.31                        |
| Age & Previously Married                                                                              |                             | 0.32                        |
| Age & Discharged to Home, Court, or Against Medical Advice                                            |                             | -0.30                       |
| Age & Medicaid                                                                                        |                             | -0.40                       |
| Age & Private                                                                                         |                             | -0.45                       |
| Anxiety Disorders & Mood Disorder                                                                     |                             | 0.32                        |
| Malnutrition & Normal Weight                                                                          |                             | 0.47                        |
| Malnutrition & Underweight                                                                            |                             | 0.41                        |
| Palliative Care on Board & Respiratory Failure                                                        |                             | 0.32                        |
| Palliative Care on Board & Insert Endotracheal Tube                                                   |                             | 0.33                        |
| Palliative Care on Board & Discharged to Hospice-Home/Hospice-Medical Facility                        |                             | 0.43                        |
| Year & NIHSS 0 to 4                                                                                   |                             | 0.36                        |
| Female & Previously Married                                                                           |                             | 0.30                        |
| Married & Single                                                                                      |                             | -0.39                       |
| Medicaid & Medicare                                                                                   |                             | -0.45                       |
| Discharged to Home Court or Against Medical Advice & Discharged/Transferred to SNF                    |                             | -0.30                       |
| Discharged to Home Court or Against Medical Advice & Discharged/Transferred to Another Rehab Facility |                             | -0.35                       |

Table III. Comparison between our best performing model with other 30-day readmission studies in the literature.

| Article                        | Method                     | Readmission cause             | Sample size (n) | PPV         | Test AUC    | Sensitivity | Specificity |
|--------------------------------|----------------------------|-------------------------------|-----------------|-------------|-------------|-------------|-------------|
| <b>Best model in our study</b> | <b>XGBoost in Design 2</b> | <b>30-day ischemic stroke</b> | <b>3,184</b>    | <b>0.43</b> | <b>0.74</b> | <b>0.20</b> | <b>0.98</b> |
| Mortazavi et al., 2016 (17)    | RF                         | 30-day all cause              | 1,004           | 0.22        | 0.63        | 0.61        | 0.61        |
| Mortazavi et al., 2016 (17)    | GBM                        | 30-day heart failure          | 1,653           | 0.15        | 0.68        | 0.45        | 0.79        |
| Golas et al. 2018 (18)         | DUNs                       | 30-day heart failure          | 6,369           | NR          | 0.70        | 0.65        | NR          |
| Wolff et al., 2019 (21)        | NB                         | 30-day all cause              | 56,558          | 0.06        | 0.65        | 0.70        | NR          |

NR= Not reported, RF= Random forest, GBM= Gradient Boosting Machine, DUNs= deep unified networks, NB= Naïve Bayes

Table IV. Performance metrics for machine learning models considering normalization for SVM.

|         | Train set                                           |                      | Test set |                |             |             |      |
|---------|-----------------------------------------------------|----------------------|----------|----------------|-------------|-------------|------|
|         | No feature selection and sampling (Design 1)        |                      |          |                |             |             |      |
| Method  | AUC                                                 | Training Time (sec.) | AUC      | 95% CI for AUC | Sensitivity | Specificity | PPV  |
| LR      | 0.76                                                | 3                    | 0.60     | (0.52, 0.67)   | 0.32        | 0.86        | 0.19 |
| RF      | 0.82                                                | 42                   | 0.57     | (0.50, 0.64)   | 0.09        | 0.93        | 0.12 |
| GBM     | 0.70                                                | 48                   | 0.68     | (0.52, 0.76)   | 0.23        | 0.95        | 0.33 |
| XGBoost | 0.76                                                | 1,752                | 0.62     | (0.56, 0.69)   | 0.30        | 0.88        | 0.21 |
| SVM     | 0.97                                                | 835                  | 0.63     | (0.55, 0.70)   | 0.32        | 0.85        | 0.19 |
|         | With ROSE-sampling (Design 2)                       |                      |          |                |             |             |      |
| Method  | AUC                                                 | Training Time (sec.) | AUC      | 95% CI for AUC | Sensitivity | Specificity | PPV  |
| LR      | 0.74                                                | 3                    | 0.63     | (0.55, 0.70)   | 0.38        | 0.72        | 0.12 |
| RF      | 0.74                                                | 33                   | 0.67     | (0.51, 0.76)   | 0.09        | 0.97        | 0.26 |
| GBM     | 0.74                                                | 48                   | 0.70     | (0.61, 0.75)   | 0.09        | 0.98        | 0.45 |
| XGBoost | 0.76                                                | 2,340                | 0.74     | (0.64, 0.78)   | 0.20        | 0.98        | 0.43 |
| SVM     | 0.80                                                | 1343                 | 0.68     | (0.53, 0.76)   | 0.38        | 0.88        | 0.28 |
|         | With feature selection and ROSE-sampling (Design 3) |                      |          |                |             |             |      |
| Method  | AUC                                                 | Training Time (sec.) | AUC      | 95% CI for AUC | Sensitivity | Specificity | PPV  |
| LR      | 0.70                                                | 3                    | 0.64     | (0.56, 0.72)   | 0.53        | 0.69        | 0.15 |
| RF      | 0.70                                                | 12                   | 0.65     | (0.56, 0.70)   | 0.30        | 0.89        | 0.24 |
| GBM     | 0.69                                                | 30                   | 0.66     | (0.58, 0.74)   | 0.17        | 0.95        | 0.26 |
| XGBoost | 0.70                                                | 2,130                | 0.65     | (0.56, 0.73)   | 0.17        | 0.95        | 0.27 |
| SVM     | 0.71                                                | 811                  | 0.65     | (0.56, 0.70)   | 0.45        | 0.78        | 0.15 |

Table V. Confusion metrics for machine learning models

| LR                                                  |     | RF |     | GBM |     | XGBoost |     | SVM |     |
|-----------------------------------------------------|-----|----|-----|-----|-----|---------|-----|-----|-----|
| No feature selection and sampling (Design 1)        |     |    |     |     |     |         |     |     |     |
| TP                                                  | FN  | TP | FN  | TP  | FN  | TP      | FN  | TP  | FN  |
| 17                                                  | 36  | 4  | 37  | 17  | 57  | 16      | 37  | 16  | 37  |
| FP                                                  | TN  | FP | TN  | FP  | TN  | FP      | TN  | FP  | TN  |
| 74                                                  | 509 | 30 | 565 | 35  | 527 | 62      | 521 | 79  | 504 |
| With ROSE-sampling (Design 2)                       |     |    |     |     |     |         |     |     |     |
| TP                                                  | FN  | TP | FN  | TP  | FN  | TP      | FN  | TP  | FN  |
| 24                                                  | 40  | 4  | 39  | 5   | 50  | 10      | 40  | 23  | 37  |
| FP                                                  | TN  | FP | TN  | FP  | TN  | FP      | TN  | FP  | TN  |
| 160                                                 | 412 | 11 | 582 | 6   | 575 | 13      | 573 | 62  | 514 |
| With feature selection and ROSE-sampling (Design 3) |     |    |     |     |     |         |     |     |     |
| TP                                                  | FN  | TP | FN  | TP  | FN  | TP      | FN  | TP  | FN  |
| 30                                                  | 27  | 18 | 42  | 8   | 40  | 8       | 40  | 28  | 39  |
| FP                                                  | TN  | FP | TN  | FP  | TN  | FP      | TN  | FP  | TN  |
| 172                                                 | 407 | 58 | 518 | 23  | 565 | 22      | 566 | 133 | 436 |

Note: TP: True Positive, FP: False Positive, FN: False Negative, TN: True Negative.

Table VI. Distribution of NIHSS score before and after imputation.

| Distribution of NIHSS before Imputation |           |           |          |            |           |           |          |
|-----------------------------------------|-----------|-----------|----------|------------|-----------|-----------|----------|
| Train set                               |           |           |          | Test set   |           |           |          |
| 0 to 4                                  | 5 to 11   | 12 to 23  | Above 24 | 0 to 4     | 5 to 11   | 12 to 23  | Above 24 |
| 281 (57%)                               | 131 (27%) | 61 (12%)  | 19 (4%)  | 80 (54.5%) | 36 (24%)  | 24 (16%)  | 7 (5.5%) |
| Distribution of NIHSS after Imputation  |           |           |          |            |           |           |          |
| Train set                               |           |           |          | Test set   |           |           |          |
| 0 to 4                                  | 5 to 11   | 12 to 23  | Above 24 | 0 to 4     | 5 to 11   | 12 to 23  | Above 24 |
| 1266 (50%)                              | 733 (29%) | 364 (14%) | 185 (7%) | 272 (43%)  | 201 (32%) | 111 (17%) | 52 (8%)  |

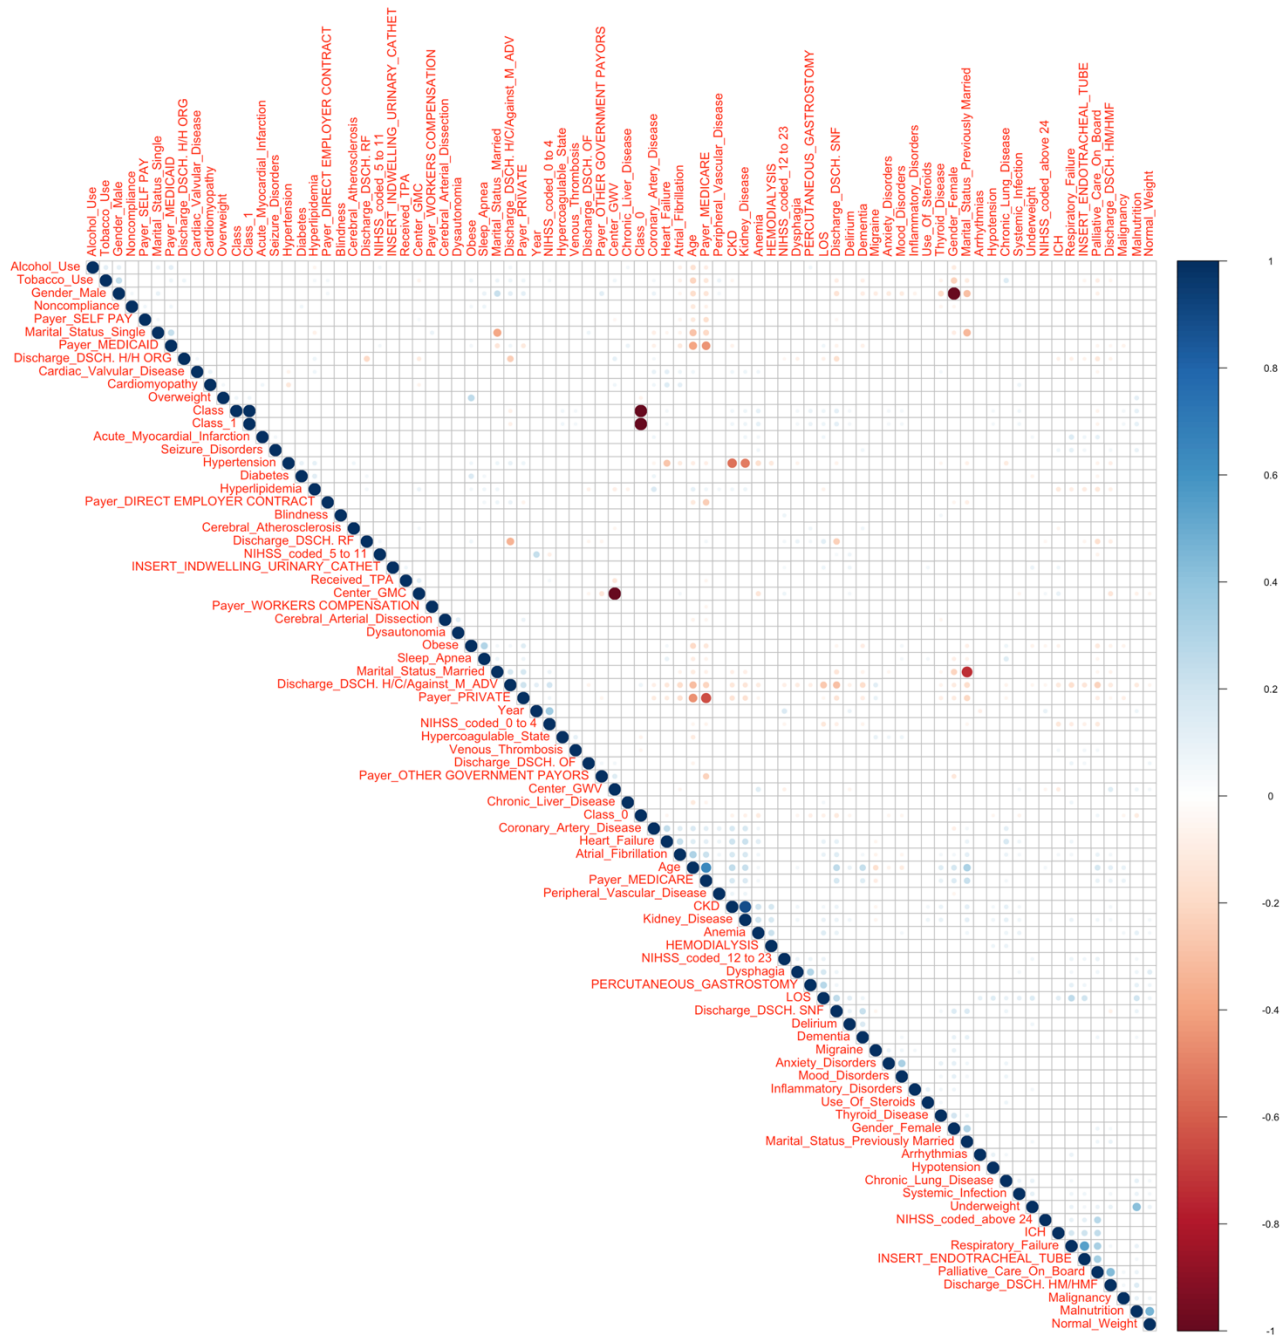

Figure I. Correlation matrix between all the variables.

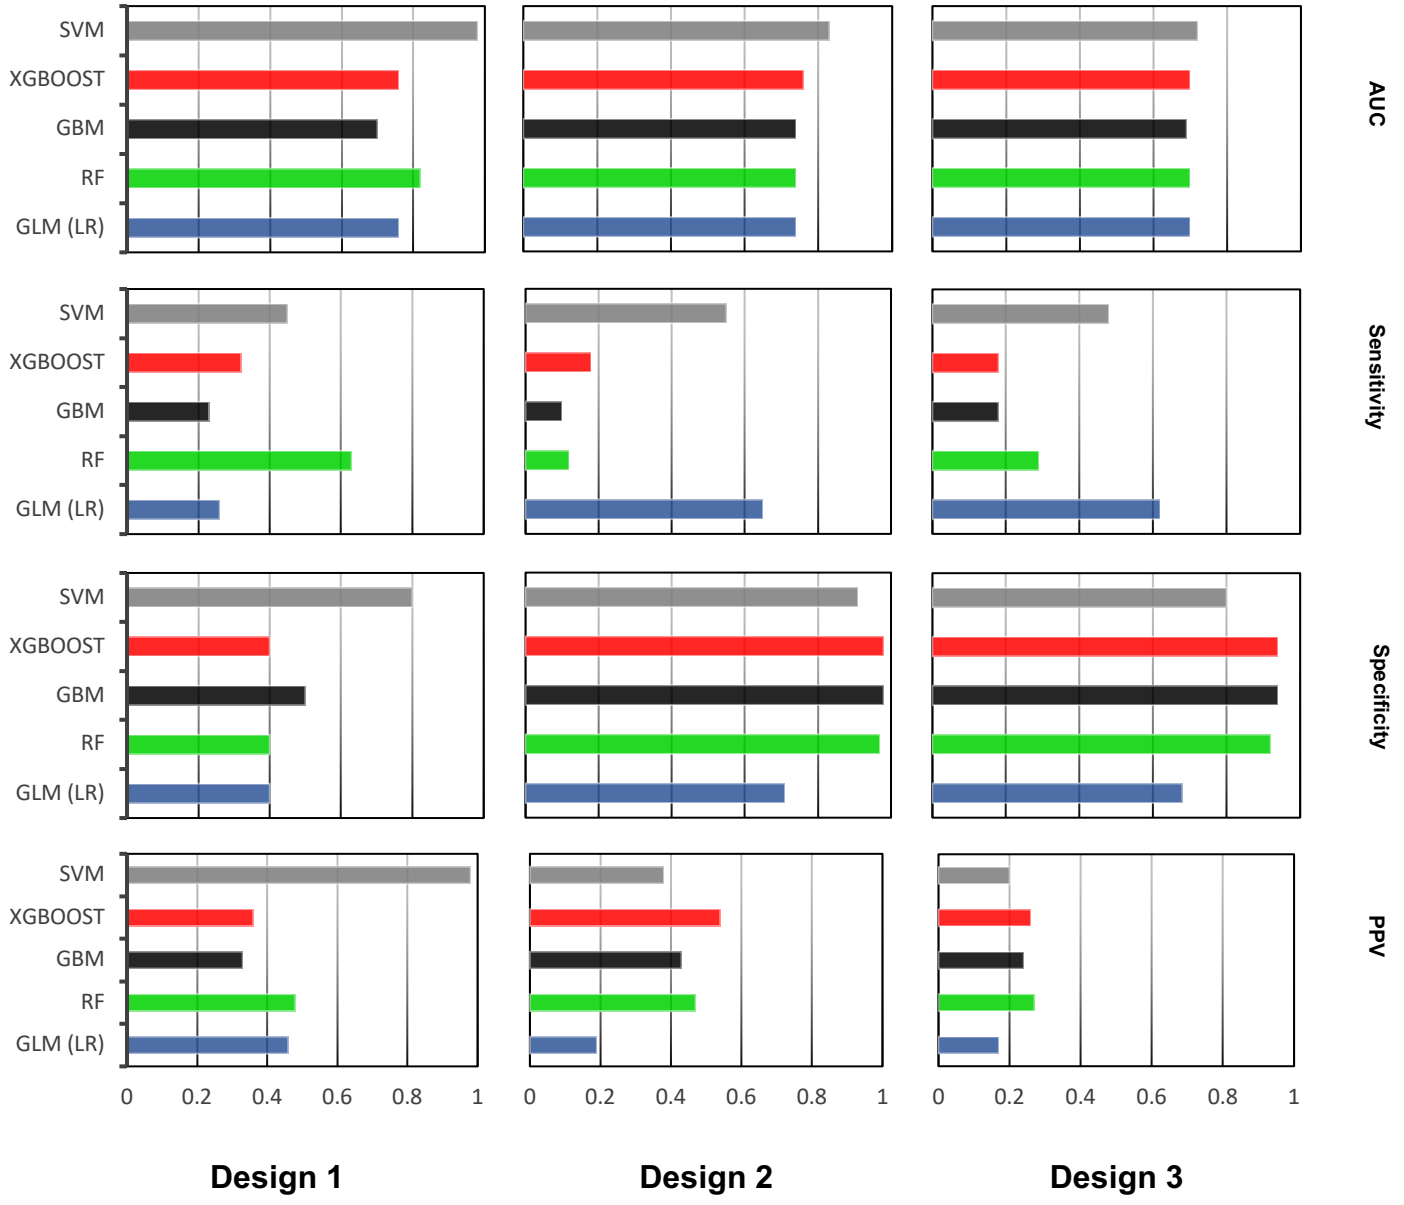

Figure II. Performance metrics of machine learning models for train sets.

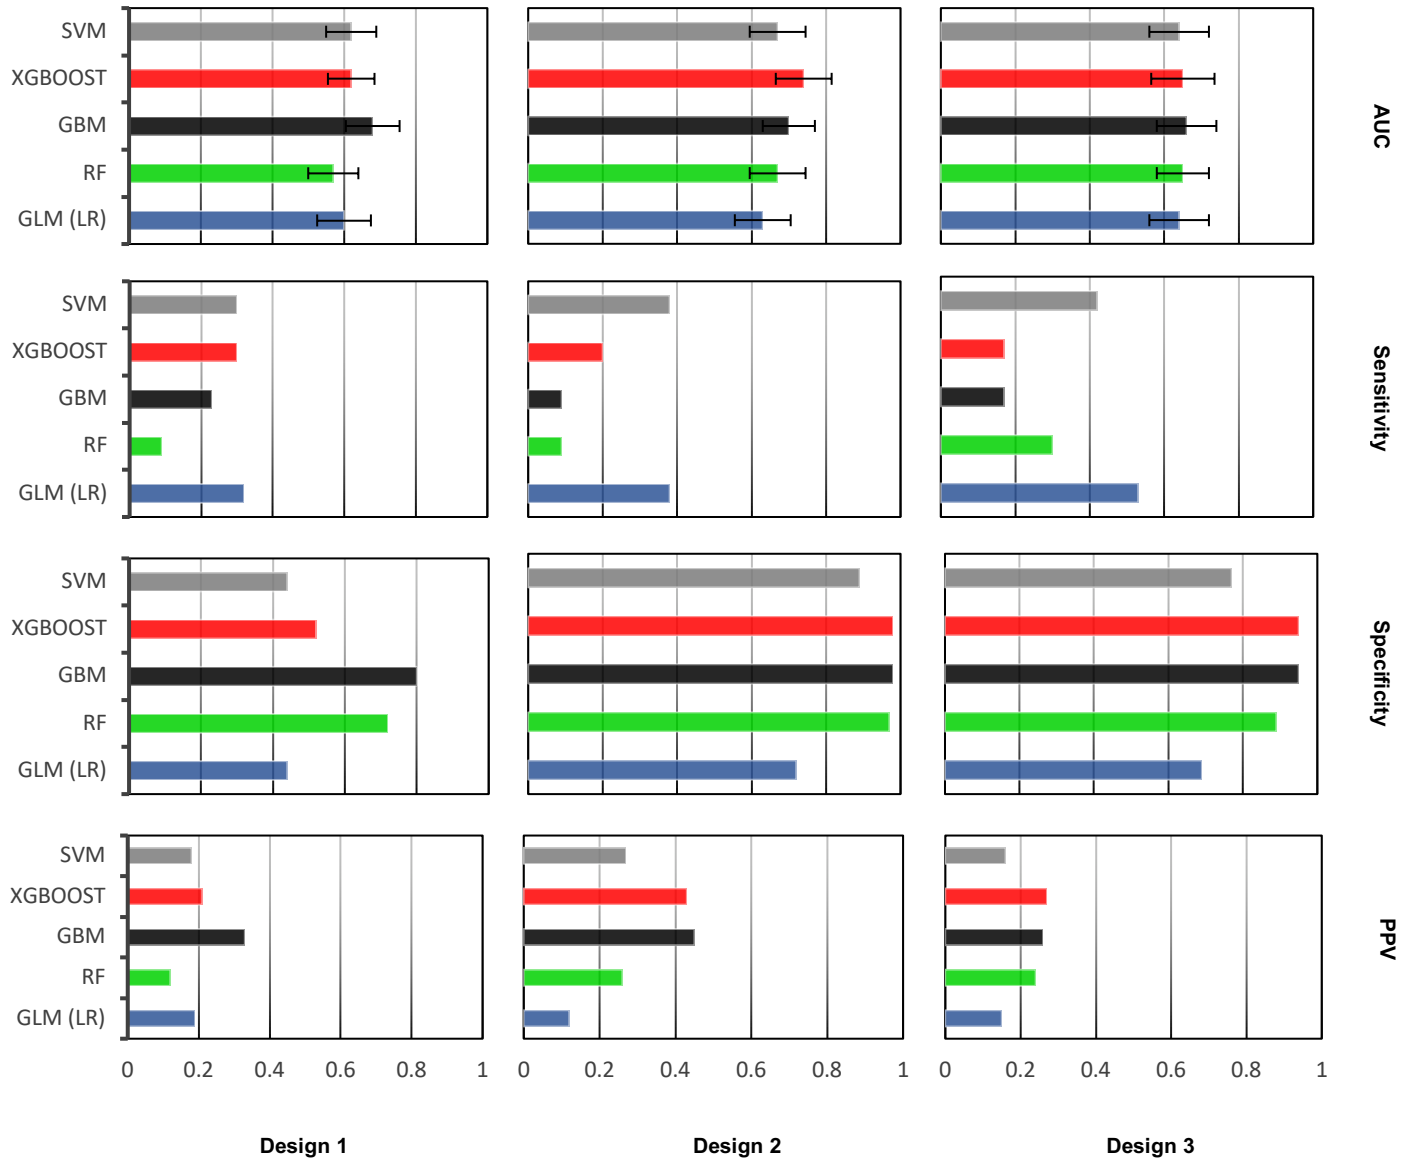

Figure III. Performance metrics of machine learning models for test sets (For AUC we provided 95% CI).



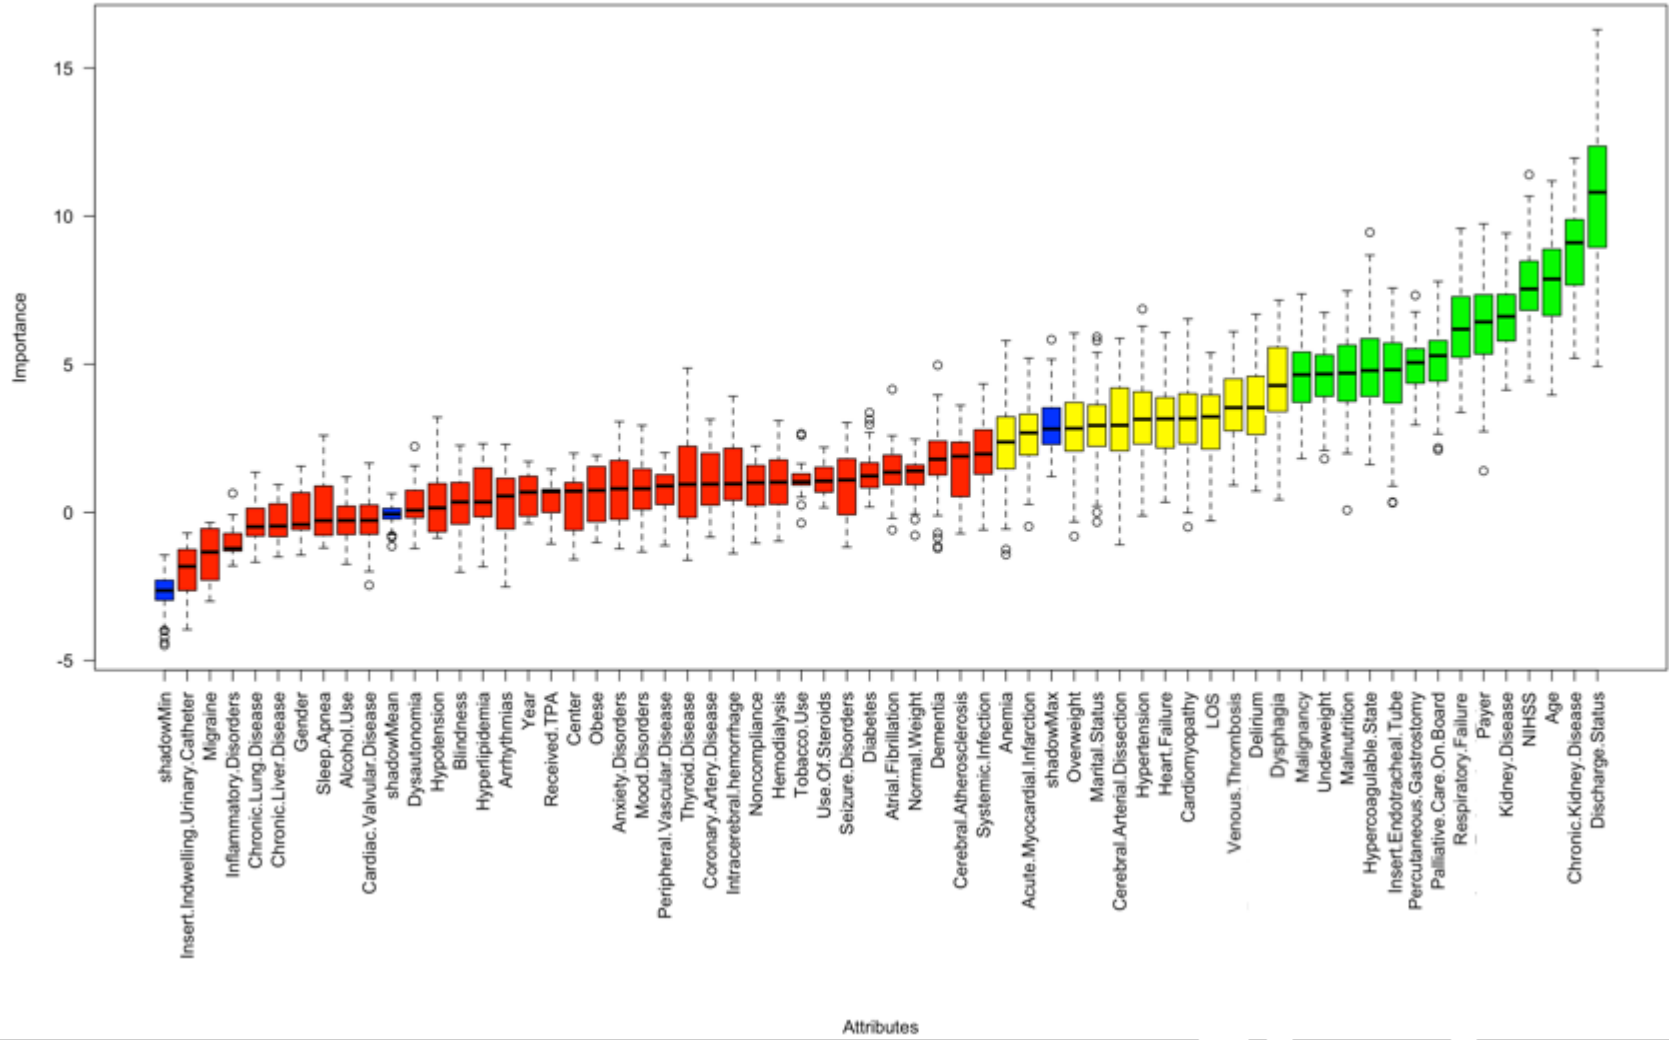

Figure IV. Selected features using Boruta Package.

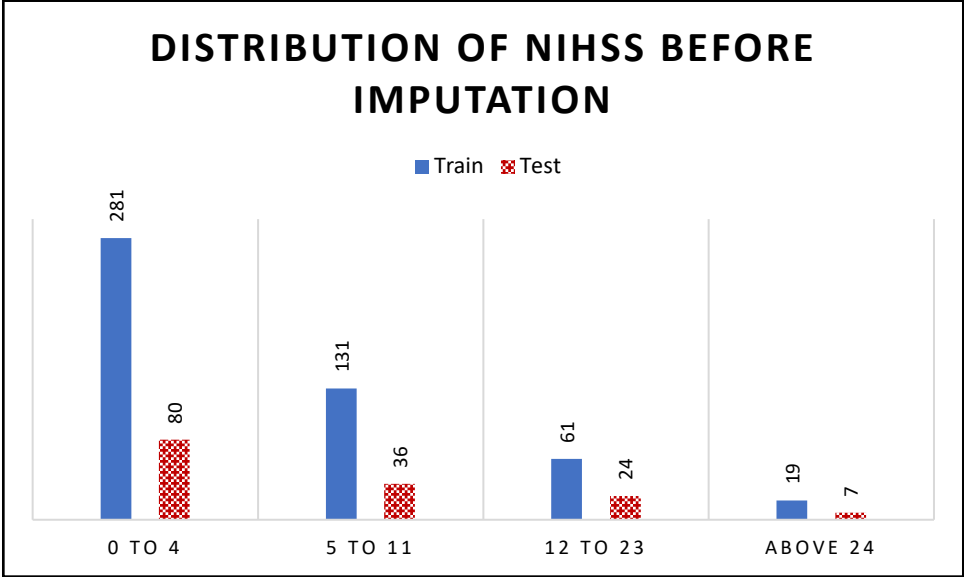

Figure V. Distribution of NIHSS before Imputation.

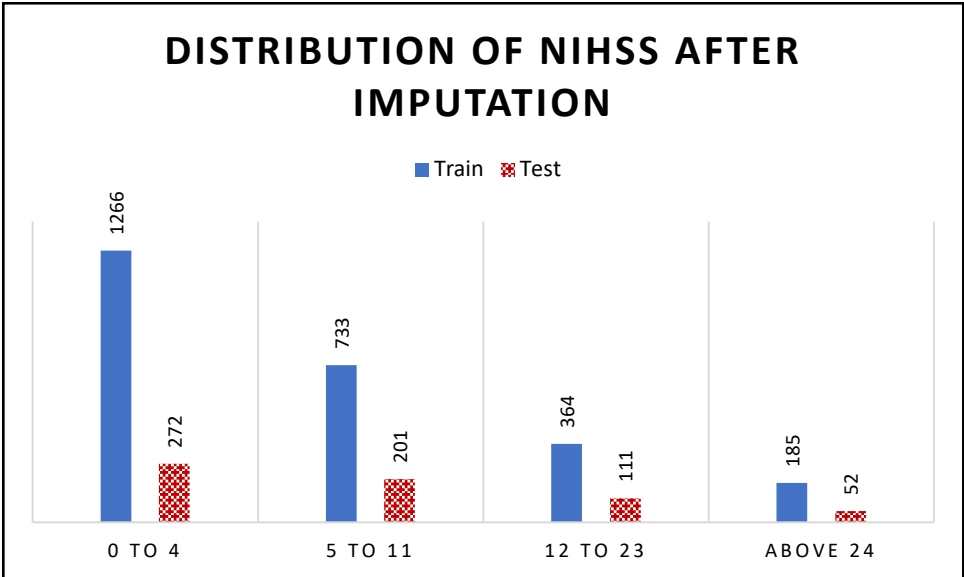

Figure VI. Distribution of NIHSS after Imputation.
